# Supplementary material for: Effect of sex, age and genetics on crossover interference in cattle
Source: PubMed Central journal article supplement (PMC5125268; doi:10.1038/srep37698), 2016-11-28
Supplement: srep37698-s1.pdf [file srep37698-s1.pdf]

# Effect of sex, age and genetics on crossover interference in cattle

Zhiying Wang<sup>1,2</sup>, Botong Shen<sup>2</sup>, Jicai Jiang<sup>2</sup>, Jinquan Li<sup>1,\*</sup>, Li Ma<sup>2,\*</sup>

<sup>1</sup> College of Animal Science, Inner Mongolia Agricultural University, Hohhot, Inner Mongolia 010018, China

<sup>2</sup> Department of Animal and Avian Sciences, University of Maryland, College Park, MD, 20742, USA

## Supplemental Figures

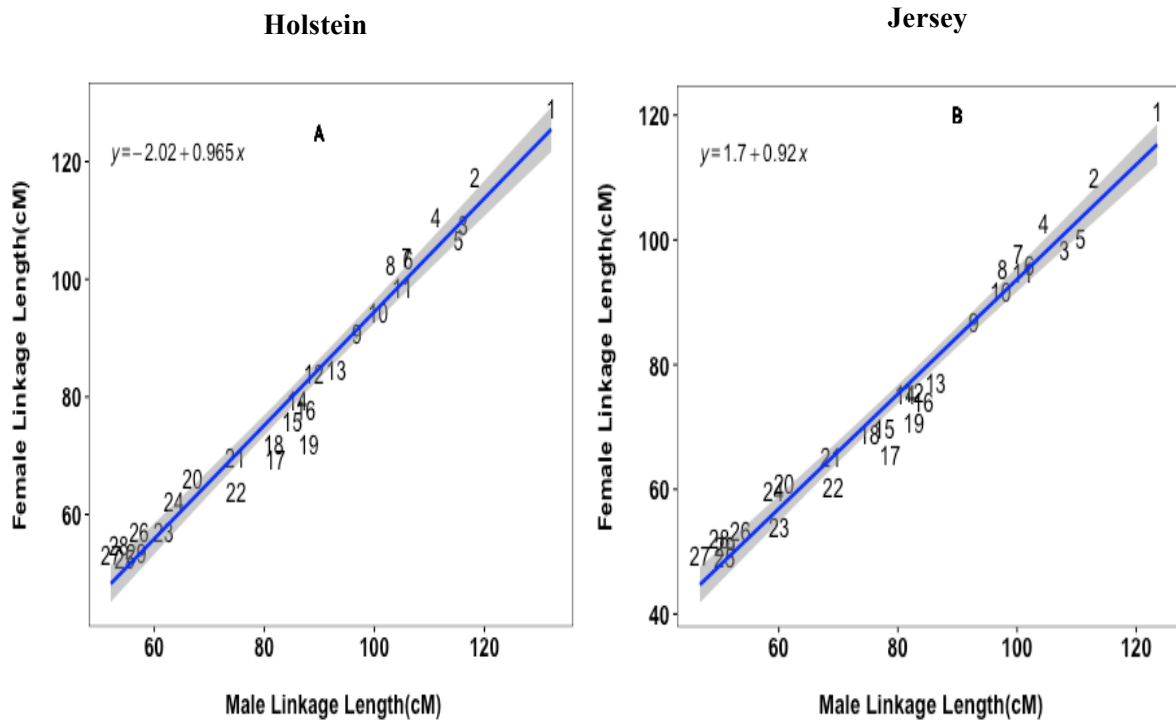

**Supplemental Figure 1. The ratio of female to male in linkage map lengths (cM).** Points are chromosome numbers. Lines and the grey shaded areas indicate the regression slopes and standard errors, respectively, excluding the X chromosome. A .in Holsteins; B. in Jerseys.

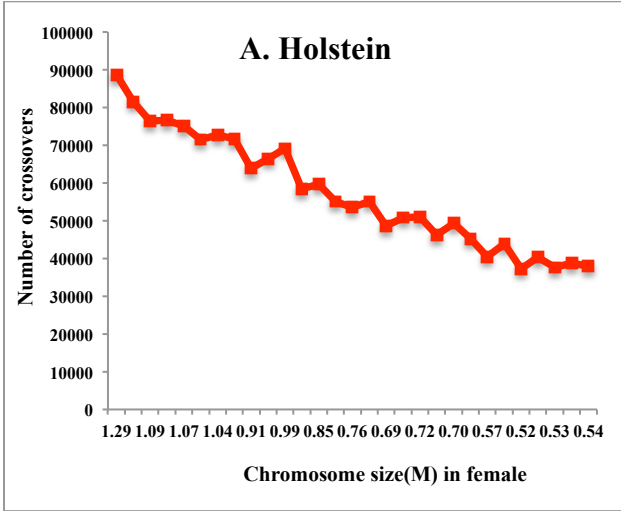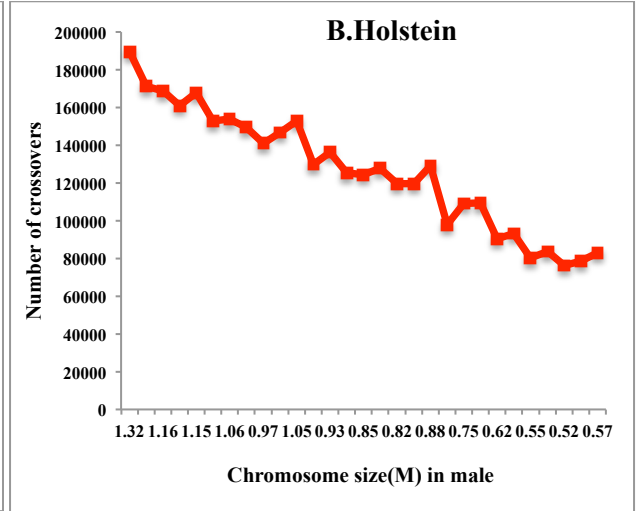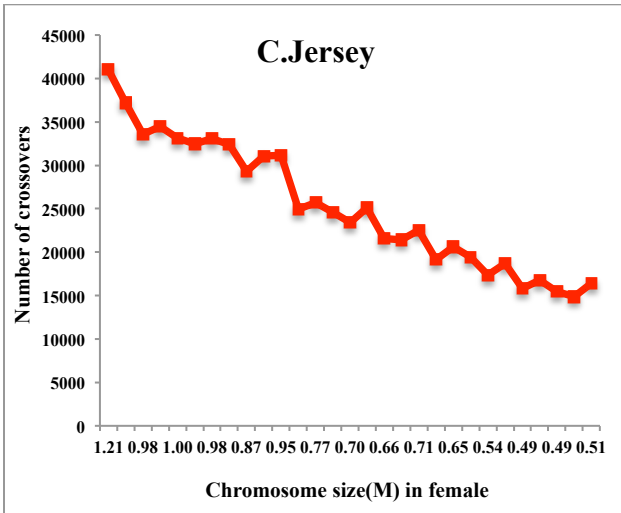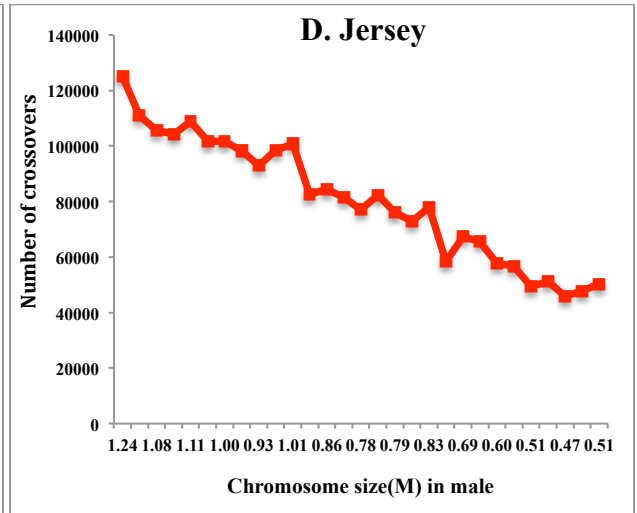

**Supplemental Figure 2. The trends of number of crossovers with chromosome size in female and male. A in female and B in male were from Holstein. C in female and D in male were from Jersey.**

## Holstein

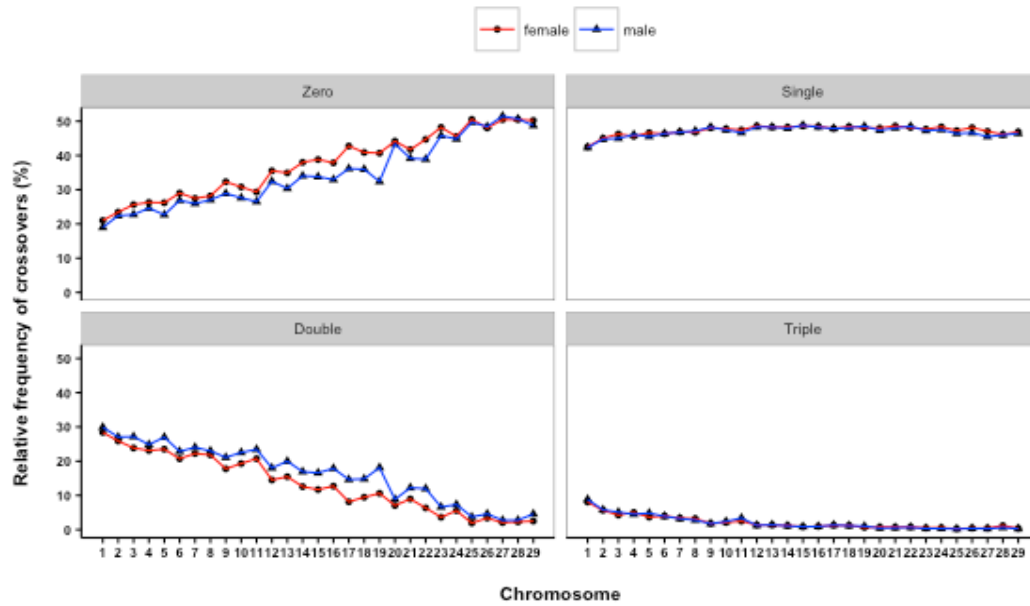

## Jersey

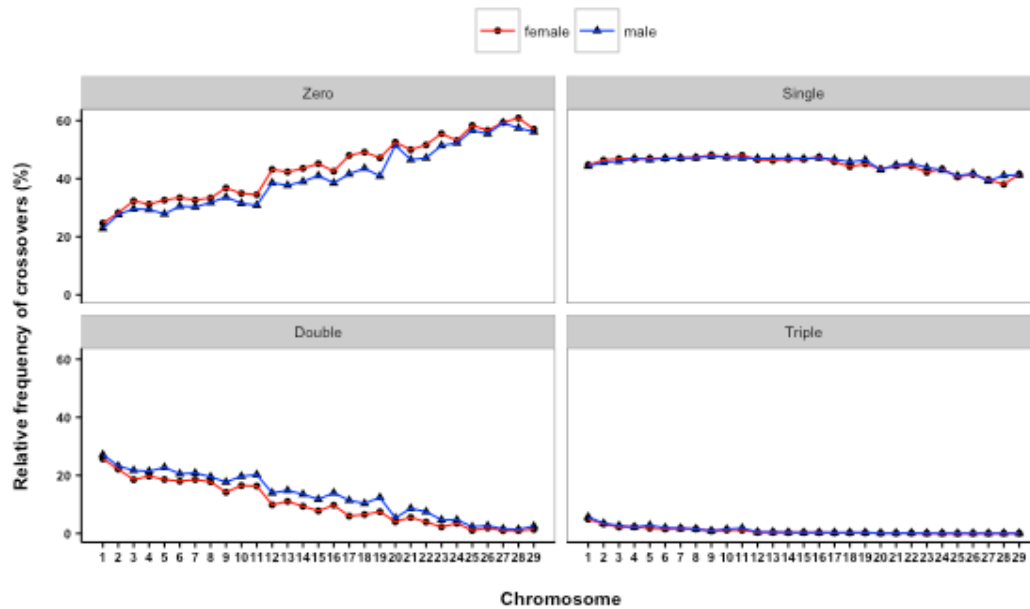

**Supplemental Figure 3. Relative frequency of Zero, Single, Double, Triple crossovers on each chromosomes. Top = Holstein; Bottom = Jersey.**

### A: Holstein

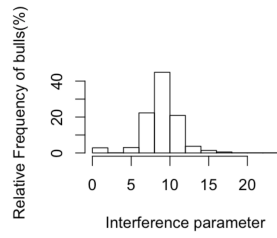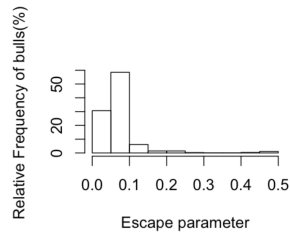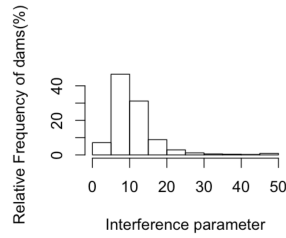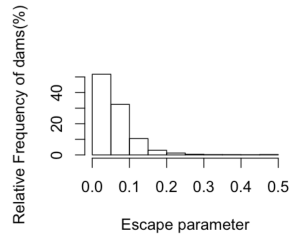

### B: Jersey

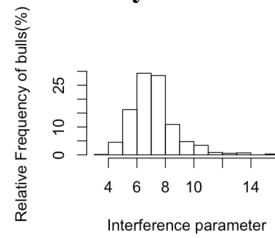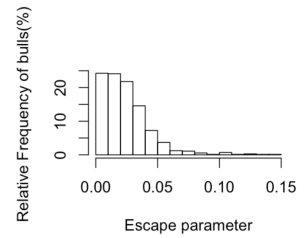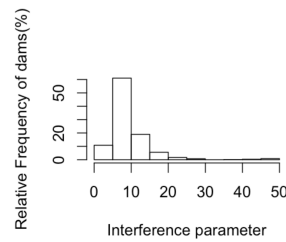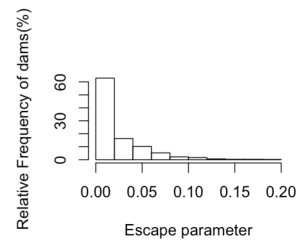

**Supplemental Figure 4. The relative frequency of bulls and cows in both of interference and escape parameters.** A) Relative frequency of interference and escape parameters in bulls and cows for Holstein. B) Relative frequency of interference and escape parameters in bulls and cows for Jersey. Left columns are the relative frequency of interference parameter in bulls and cows. Right column are the relative frequency of escape parameter in bulls and cows

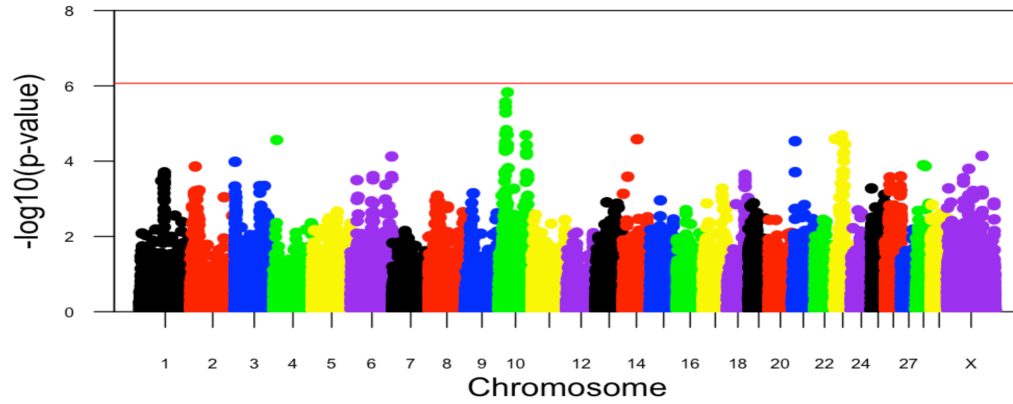

**Supplemental Figure 5. Manhattan plot of the GWAS of the interference parameter for males in Jersey.** Different colors were used to distinguish the 30 chromosomes. The genome-wide significance level of  $8.3 \times 10^{-7}$  was shown by the red horizontal solid line.

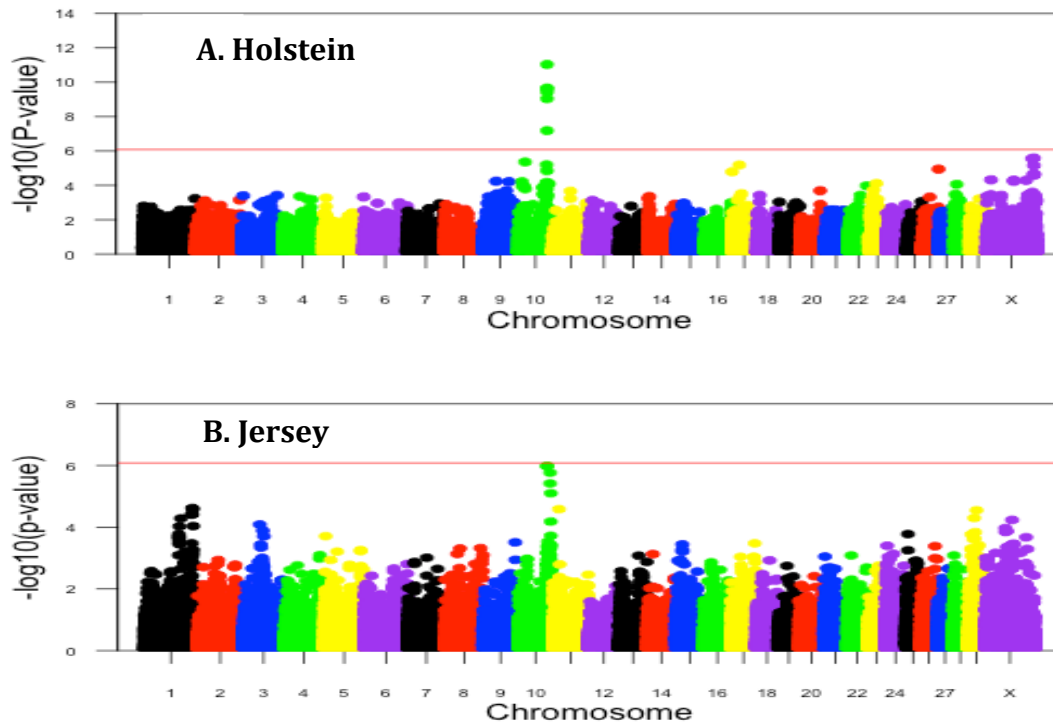

**Supplemental Figure 6. Manhattan plot of the meta-GWAS of interference parameter for males (A) and for females (B) in both of Holstein and Jersey.** Different colors were used to distinguish the 30 chromosomes. The genome-wide significance level of  $8.3 \times 10^{-7}$  was shown by the red horizontal solid line.

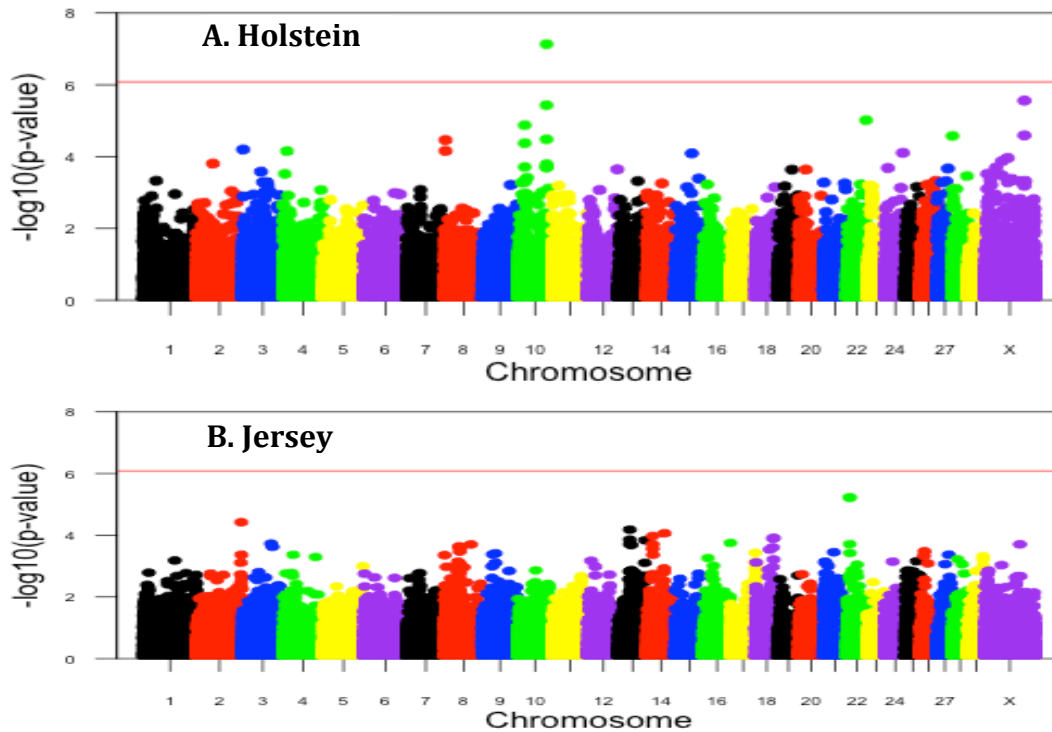

**Supplemental Figure 7. Manhattan plots of the GWAS of inter-crossover distance in males (A) and females (B) in both of Holstein and Jersey.** Different colors were used to distinguish the 30 chromosomes. The genome-wide significance level of  $8.3 \times 10^{-7}$  was shown by the red horizontal solid line.

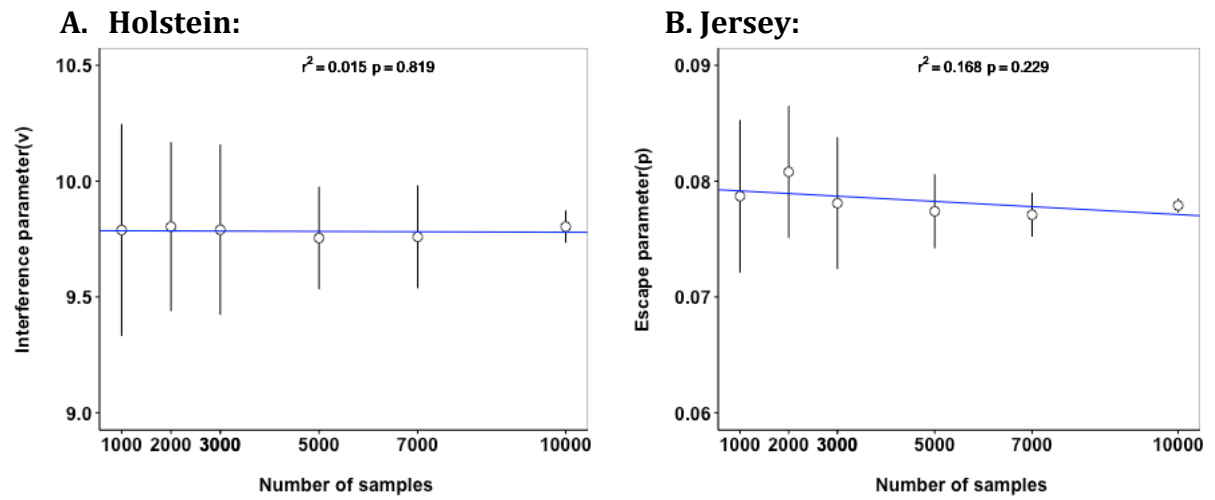

**Supplemental Figure 8. Estimates of interference (A) and escape parameters (B) from different samples size in Holstein. Error bars show 95% confidence intervals.**



## Supplemental Tables

**Supplemental Table 1. Distribution of crossover counts across 29 autosomes in 71,687 female meioses for Holstein.** The values in bracket are the relative proportions of zero, single, double and triple crossovers in progeny of dams.

| Chromosome | Crossover counts |                |                |              | Map length(M) |
|------------|------------------|----------------|----------------|--------------|---------------|
|            | 0                | 1              | 2              | 3            |               |
| 1          | 15053 (21.00%)   | 30481 (42.52%) | 20367 (28.41%) | 5786 (8.07%) | 1.2912        |
| 2          | 16819 (23.46%)   | 32259 (45.00%) | 18563 (25.89%) | 4046 (5.64%) | 1.1733        |
| 3          | 18370 (25.63%)   | 33175 (46.28%) | 17091 (23.84%) | 3051 (4.26%) | 1.0930        |
| 4          | 18848 (26.29%)   | 32678 (45.58%) | 16576 (23.12%) | 3585 (5.00%) | 1.1062        |
| 5          | 18777 (26.19%)   | 33440 (46.65%) | 16848 (23.5%)  | 2622 (3.66%) | 1.0674        |
| 6          | 20794 (29.01%)   | 33204 (46.32%) | 14846 (20.71%) | 2843 (3.97%) | 1.0343        |
| 7          | 19696 (27.47%)   | 33624 (46.90%) | 15948 (22.25%) | 2419 (3.37%) | 1.0376        |
| 8          | 20203 (28.18%)   | 33543 (46.79%) | 15644 (21.82%) | 2297 (3.20%) | 1.0267        |
| 9          | 23175 (32.33%)   | 34472 (48.09%) | 12740 (17.77%) | 1300 (1.81%) | 0.9095        |
| 10         | 22073 (30.79%)   | 34274 (47.81%) | 13840 (19.31%) | 1500 (2.09%) | 0.9426        |
| 11         | 21029 (29.33%)   | 34023 (47.46%) | 14856 (20.72%) | 1779 (2.48%) | 0.9873        |
| 12         | 25472 (35.53%)   | 34850 (48.61%) | 10406 (14.52%) | 959 (1.34%)  | 0.8392        |
| 13         | 25028 (34.91%)   | 34620 (48.29%) | 11084 (15.46%) | 955 (1.33%)  | 0.8465        |
| 14         | 27235 (37.99%)   | 34605 (48.27%) | 9002 (12.56%)  | 845 (1.18%)  | 0.7939        |
| 15         | 27831 (38.82%)   | 34862 (48.63%) | 8384 (11.70%)  | 610 (0.85%)  | 0.7581        |
| 16         | 27139 (37.86%)   | 34773 (48.51%) | 9100 (12.69%)  | 675 (0.94%)  | 0.7800        |
| 17         | 30648 (42.75%)   | 34309 (47.86%) | 5839 (8.15%)   | 891 (1.24%)  | 0.6940        |
| 18         | 29307 (40.88%)   | 34731 (48.45%) | 6774 (9.45%)   | 875 (1.22%)  | 0.7196        |
| 19         | 29163 (40.68%)   | 34456 (48.06%) | 7601 (10.60%)  | 467 (0.65%)  | 0.7200        |
| 20         | 31673 (44.18%)   | 34408 (48.00%) | 5055 (7.05%)   | 551 (0.77%)  | 0.6626        |
| 21         | 29902 (41.71%)   | 34838 (48.60%) | 6419 (8.95%)   | 528 (0.74%)  | 0.6981        |
| 22         | 32052 (44.71%)   | 34529 (48.17%) | 4543 (6.34%)   | 563 (0.79%)  | 0.6393        |
| 23         | 34559 (48.21%)   | 34184 (47.69%) | 2600 (3.63%)   | 344 (0.48%)  | 0.5703        |
| 24         | 32654 (45.55%)   | 34660 (48.35%) | 3974 (5.54%)   | 399 (0.56%)  | 0.6222        |
| 25         | 36239 (50.55%)   | 33886 (47.27%) | 1364 (1.90%)   | 198 (0.28%)  | 0.5244        |
| 26         | 34439 (48.04%)   | 34508 (48.14%) | 2424 (3.38%)   | 316 (0.44%)  | 0.5705        |
| 27         | 36177 (50.47%)   | 33740 (47.07%) | 1469 (2.05%)   | 301 (0.42%)  | 0.5313        |
| 28         | 36178 (50.47%)   | 33061 (46.12%) | 1620 (2.26%)   | 828 (1.16%)  | 0.5477        |
| 29         | 36016 (50.24%)   | 33627 (46.91%) | 1791 (2.50%)   | 253 (0.35%)  | 0.5362        |

**Supplemental Table 2. Distribution of crossover counts across 29 autosomes in 147,327 male meioses for Holstein.** The values in bracket are the relative proportions of zero, single, double and triple crossovers in progeny of sires.

| Chromosome | Crossover counts |               |               |              | Map length(M) |
|------------|------------------|---------------|---------------|--------------|---------------|
|            | 0                | 1             | 2             | 3            |               |
| 1          | 27979(18.99%)    | 62309(42.29%) | 44049(29.90%) | 12990(8.82%) | 1.3214        |
| 2          | 33009(22.41%)    | 65956(44.77%) | 39862(27.06%) | 8500(5.77%)  | 1.1830        |
| 3          | 33501(22.74%)    | 66303(45.00%) | 40016(27.16%) | 7507(5.10%)  | 1.1619        |
| 4          | 36265(24.62%)    | 67840(46.05%) | 36603(24.84%) | 6619(4.49%)  | 1.1125        |
| 5          | 33396(22.67%)    | 67086(45.54%) | 39752(26.98%) | 7093(4.81%)  | 1.1529        |
| 6          | 39590(26.87%)    | 68329(46.38%) | 33666(22.85%) | 5742(3.90%)  | 1.0618        |
| 7          | 38236(25.95%)    | 68955(46.80%) | 35378(24.01%) | 4758(3.23%)  | 1.0584        |
| 8          | 39820(27.03%)    | 69531(47.20%) | 33877(22.99%) | 4099(2.78%)  | 1.0296        |
| 9          | 42594(28.91%)    | 71098(48.26%) | 31070(21.09%) | 2565(1.74%)  | 0.9685        |
| 10         | 40698(27.62%)    | 69936(47.47%) | 33196(22.53%) | 3497(2.37%)  | 1.0067        |
| 11         | 39066(26.52%)    | 68760(46.67%) | 34519(23.43%) | 4982(3.38%)  | 1.0509        |
| 12         | 47783(32.43%)    | 71202(48.33%) | 26535(18.01%) | 1807(1.23%)  | 0.8903        |
| 13         | 44744(30.37%)    | 71110(48.27%) | 29423(19.97%) | 2050(1.39%)  | 0.9306        |
| 14         | 50139(34.03%)    | 70644(47.95%) | 24928(16.92%) | 1616(1.10%)  | 0.8602        |
| 15         | 49794(33.8%)     | 71883(48.79%) | 24420(16.58%) | 1230(0.83%)  | 0.8510        |
| 16         | 48534(32.94%)    | 71133(48.28%) | 26329(17.87%) | 1331(0.90%)  | 0.8750        |
| 17         | 53283(36.17%)    | 70533(47.88%) | 21559(14.63%) | 1952(1.32%)  | 0.8203        |
| 18         | 52992(35.97%)    | 70836(48.08%) | 21820(14.81%) | 1679(1.14%)  | 0.817         |
| 19         | 47703(32.38%)    | 71472(48.51%) | 26694(18.12%) | 1458(0.99%)  | 0.8809        |
| 20         | 63865(43.35%)    | 69784(47.37%) | 13011(8.83%)  | 667(0.45%)   | 0.6696        |
| 21         | 57721(39.18%)    | 70773(48.04%) | 18027(12.24%) | 806(0.55%)   | 0.7471        |
| 22         | 57296(38.89%)    | 71419(48.48%) | 17635(11.97%) | 977(0.66%)   | 0.7487        |
| 23         | 67472(45.8%)     | 69657(47.28%) | 9729(6.60%)   | 469(0.32%)   | 0.6172        |
| 24         | 66010(44.81%)    | 70023(47.53%) | 10808(7.34%)  | 486(0.33%)   | 0.6358        |
| 25         | 73193(49.68%)    | 68382(46.42%) | 5472(3.71%)   | 280(0.19%)   | 0.5463        |
| 26         | 71356(48.43%)    | 68692(46.63%) | 6762(4.59%)   | 517(0.35%)   | 0.5726        |
| 27         | 75855(51.49%)    | 67039(45.5%)  | 4030(2.74%)   | 403(0.27%)   | 0.5210        |
| 28         | 74666(50.68%)    | 67712(45.96%) | 4070(2.76%)   | 879(0.60%)   | 0.5358        |
| 29         | 71788(48.73%)    | 68421(46.44%) | 6728(4.57%)   | 390(0.26%)   | 0.5673        |

**Supplemental Table 3. Distribution of crossover counts across 29 autosomes in 37,008 female meioses for Jersey.** The values in bracket were the relative proportions of zero, single, double and triple crossovers in progeny of dams.

| Chromosome | Crossover counts |                |               |              | Map length(M) |
|------------|------------------|----------------|---------------|--------------|---------------|
|            | 0                | 1              | 2             | 3            |               |
| 1          | 9139 (24.69%)    | 16551 (44.72%) | 9502 (25.68%) | 1816 (4.91%) | 1.2084        |
| 2          | 10446 (28.23%)   | 17166 (46.38%) | 8194 (22.14%) | 1202 (3.25%) | 1.1019        |
| 3          | 11967 (32.34%)   | 17358 (46.90%) | 6861 (18.54%) | 822 (2.22%)  | 0.9842        |
| 4          | 11547 (31.20%)   | 17311 (46.78%) | 7307 (19.74%) | 843 (2.28%)  | 1.0287        |
| 5          | 12063 (32.6%)    | 17395 (47.00%) | 6880 (18.59%) | 670 (1.81%)  | 1.0020        |
| 6          | 12367 (33.42%)   | 17392 (47.00%) | 6665 (18.01%) | 584 (1.58%)  | 0.9610        |
| 7          | 12071 (32.62%)   | 17431 (47.10%) | 6867 (18.56%) | 639 (1.73%)  | 0.9773        |
| 8          | 12338 (33.34%)   | 17514 (47.32%) | 6581 (17.78%) | 575 (1.55%)  | 0.9537        |
| 9          | 13623 (36.81%)   | 17814 (48.14%) | 5252 (14.19%) | 319 (0.86%)  | 0.8685        |
| 10         | 12924 (34.92%)   | 17549 (47.42%) | 6109 (16.51%) | 426 (1.15%)  | 0.9166        |
| 11         | 12768 (34.5%)    | 17776 (48.03%) | 6047 (16.34%) | 417 (1.13%)  | 0.9496        |
| 12         | 15981 (43.18%)   | 17233 (46.57%) | 3652 (9.87%)  | 142 (0.38%)  | 0.7568        |
| 13         | 15661 (42.32%)   | 17118 (46.25%) | 4085 (11.04%) | 144 (0.39%)  | 0.7710        |
| 14         | 16116 (43.55%)   | 17300 (46.75%) | 3467 (9.37%)  | 125 (0.34%)  | 0.7536        |
| 15         | 16716 (45.17%)   | 17283 (46.7%)  | 2883 (7.79%)  | 126 (0.34%)  | 0.6987        |
| 16         | 15748 (42.55%)   | 17547 (47.41%) | 3596 (9.72%)  | 117 (0.32%)  | 0.7419        |
| 17         | 17763 (48%)      | 16960 (45.83%) | 2217 (5.99%)  | 68 (0.18%)   | 0.6573        |
| 18         | 18182 (49.13%)   | 16325 (44.11%) | 2416 (6.53%)  | 85 (0.23%)   | 0.6886        |
| 19         | 17455 (47.17%)   | 16695 (45.11%) | 2777 (7.5%)   | 81 (0.22%)   | 0.7085        |
| 20         | 19448 (52.55%)   | 16030 (43.31%) | 1485 (4.01%)  | 45 (0.12%)   | 0.6106        |
| 21         | 18489 (49.96%)   | 16436 (44.41%) | 2049 (5.54%)  | 34 (0.09%)   | 0.6543        |
| 22         | 19107 (51.63%)   | 16407 (44.33%) | 1453 (3.93%)  | 41 (0.11%)   | 0.6053        |
| 23         | 20544 (55.51%)   | 15613 (42.19%) | 836 (2.26%)   | 15 (0.04%)   | 0.5408        |
| 24         | 19658 (53.12%)   | 16032 (43.32%) | 1294 (3.5%)   | 24 (0.06%)   | 0.5978        |
| 25         | 21586 (58.33%)   | 15026 (40.6%)  | 393 (1.06%)   | 3 (0.01%)    | 0.4925        |
| 26         | 20964 (56.65%)   | 15329 (41.42%) | 700 (1.89%)   | 15 (0.04%)   | 0.5331        |
| 27         | 21951 (59.31%)   | 14675 (39.65%) | 366 (0.99%)   | 16 (0.04%)   | 0.4932        |
| 28         | 22532 (60.88%)   | 14084 (38.06%) | 376 (1.02%)   | 16 (0.04%)   | 0.5221        |
| 29         | 21119 (57.07%)   | 15375 (41.55%) | 506 (1.37%)   | 8 (0.02%)    | 0.5089        |

**Supplemental Table 4. Distribution of crossover counts across 29 chromosomes in 108,163 male meioses for Jersey.** The values in bracket were the relative proportions of zero, single, double and triple crossovers in progeny of sires.

| Chromosome | Crossover counts |               |               |             | Map length(M) |
|------------|------------------|---------------|---------------|-------------|---------------|
|            | 0                | 1             | 2             | 3           |               |
| 1          | 24718(22.85%)    | 47952(44.33%) | 29340(27.13%) | 6153(5.69%) | 1.2350        |
| 2          | 29892(27.64%)    | 49364(45.64%) | 25126(23.23%) | 3781(3.50%) | 1.1291        |
| 3          | 31990(29.58%)    | 49740(45.99%) | 23505(21.73%) | 2928(2.71%) | 1.0797        |
| 4          | 31780(29.38%)    | 50823(46.99%) | 23181(21.43%) | 2379(2.20%) | 1.0450        |
| 5          | 30112(27.84%)    | 50346(46.55%) | 24626(22.77%) | 3079(2.85%) | 1.1065        |
| 6          | 32980(30.49%)    | 50821(46.99%) | 22234(20.56%) | 2128(1.97%) | 1.0208        |
| 7          | 32753(30.28%)    | 50948(47.10%) | 22512(20.81%) | 1950(1.80%) | 1.0021        |
| 8          | 34365(31.77%)    | 51022(47.17%) | 21102(19.51%) | 1674(1.55%) | 0.9760        |
| 9          | 36392(33.65%)    | 51633(47.74%) | 19155(17.71%) | 983(0.91%)  | 0.9274        |
| 10         | 34061(31.49%)    | 51207(47.34%) | 21291(19.68%) | 1604(1.48%) | 0.9729        |
| 11         | 33355(30.84%)    | 50915(47.07%) | 21898(20.25%) | 1995(1.84%) | 1.0094        |
| 12         | 41676(38.53%)    | 50865(47.03%) | 15095(13.96%) | 527(0.49%)  | 0.8264        |
| 13         | 40779(37.7%)     | 50814(46.98%) | 16024(14.81%) | 546(0.50%)  | 0.8633        |
| 14         | 42178(38.99%)    | 50968(47.12%) | 14605(13.50%) | 412(0.38%)  | 0.8127        |
| 15         | 44377(41.03%)    | 50737(46.91%) | 12746(11.78%) | 303(0.28%)  | 0.7772        |
| 16         | 41632(38.49%)    | 51047(47.19%) | 15118(13.98%) | 366(0.34%)  | 0.8428        |
| 17         | 45014(41.62%)    | 50471(46.66%) | 12344(11.41%) | 334(0.31%)  | 0.7866        |
| 18         | 47119(43.56%)    | 49517(45.78%) | 11199(10.35%) | 328(0.30%)  | 0.7520        |
| 19         | 44208(40.87%)    | 50208(46.42%) | 13410(12.40%) | 337(0.31%)  | 0.8269        |
| 20         | 55692(51.49%)    | 46563(43.05%) | 5797(5.36%)   | 111(0.10%)  | 0.6089        |
| 21         | 50334(46.54%)    | 48339(44.69%) | 9348(8.64%)   | 142(0.13%)  | 0.6877        |
| 22         | 50964(47.12%)    | 48942(45.25%) | 8098(7.49%)   | 159(0.15%)  | 0.6916        |
| 23         | 55612(51.41%)    | 47409(43.83%) | 5070(4.69%)   | 72(0.07%)   | 0.6006        |
| 24         | 56556(52.29%)    | 46486(42.98%) | 5066(4.68%)   | 55(0.05%)   | 0.5915        |
| 25         | 61289(56.66%)    | 44350(41.00%) | 2490(2.30%)   | 34(0.03%)   | 0.5091        |
| 26         | 59994(55.47%)    | 45219(41.81%) | 2891(2.67%)   | 59(0.05%)   | 0.5356        |
| 27         | 64030(59.20%)    | 42393(39.19%) | 1727(1.60%)   | 13(0.01%)   | 0.4677        |
| 28         | 62108(57.42%)    | 44481(41.12%) | 1526(1.41%)   | 48(0.04%)   | 0.5004        |
| 29         | 60732(56.15%)    | 44675(41.30%) | 2717(2.51%)   | 39(0.04%)   | 0.5099        |

**Supplemental Table 5. The relative frequency (%) of two or more crossovers in Holstein and Jersey.**

| Chromosome | Holstein |       | Jersey |       | HO:JE           |               |
|------------|----------|-------|--------|-------|-----------------|---------------|
|            | Female   | Male  | Female | Male  | Ratio of female | Ratio of male |
| 1          | 36.48    | 38.72 | 30.58  | 32.81 | 1.19            | 1.18          |
| 2          | 31.54    | 32.83 | 25.39  | 26.73 | 1.24            | 1.23          |
| 3          | 28.10    | 32.26 | 20.76  | 24.44 | 1.35            | 1.32          |
| 4          | 28.12    | 29.34 | 22.02  | 23.63 | 1.28            | 1.24          |
| 5          | 27.16    | 31.80 | 20.40  | 25.61 | 1.33            | 1.24          |
| 6          | 24.68    | 26.75 | 19.59  | 22.52 | 1.26            | 1.19          |
| 7          | 25.62    | 27.24 | 20.28  | 22.62 | 1.26            | 1.20          |
| 8          | 25.03    | 25.78 | 19.34  | 21.06 | 1.29            | 1.22          |
| 9          | 19.59    | 22.83 | 15.05  | 18.62 | 1.30            | 1.23          |
| 10         | 21.40    | 24.91 | 17.66  | 21.17 | 1.21            | 1.18          |
| 11         | 23.21    | 26.81 | 17.47  | 22.09 | 1.33            | 1.21          |
| 12         | 15.85    | 19.24 | 10.25  | 14.44 | 1.55            | 1.33          |
| 13         | 16.79    | 21.36 | 11.43  | 15.32 | 1.47            | 1.39          |
| 14         | 13.74    | 18.02 | 9.71   | 13.88 | 1.42            | 1.30          |
| 15         | 12.55    | 17.41 | 8.13   | 12.06 | 1.54            | 1.44          |
| 16         | 13.64    | 18.77 | 10.03  | 14.32 | 1.36            | 1.31          |
| 17         | 9.39     | 15.96 | 6.17   | 11.72 | 1.52            | 1.36          |
| 18         | 10.67    | 15.95 | 6.76   | 10.66 | 1.58            | 1.50          |
| 19         | 11.25    | 19.11 | 7.72   | 12.71 | 1.46            | 1.50          |
| 20         | 7.82     | 9.28  | 4.13   | 5.46  | 1.89            | 1.70          |
| 21         | 9.69     | 12.78 | 5.63   | 8.77  | 1.72            | 1.46          |
| 22         | 7.12     | 12.63 | 4.04   | 7.63  | 1.76            | 1.65          |
| 23         | 4.11     | 6.92  | 2.30   | 4.75  | 1.79            | 1.46          |
| 24         | 6.10     | 7.67  | 3.56   | 4.73  | 1.71            | 1.62          |
| 25         | 2.18     | 3.90  | 1.07   | 2.33  | 2.04            | 1.67          |
| 26         | 3.82     | 4.94  | 1.93   | 2.73  | 1.98            | 1.81          |
| 27         | 2.47     | 3.01  | 1.03   | 1.61  | 2.39            | 1.87          |
| 28         | 3.41     | 3.36  | 1.06   | 1.46  | 3.22            | 2.31          |
| 29         | 2.85     | 4.83  | 1.39   | 2.55  | 2.05            | 1.90          |
| mean       | 15.32    | 18.43 | 11.20  | 14.08 | 1.60            | 1.45          |

**Supplemental Table 6. Estimates of interference and escape parameters on each chromosome for female and male in Holstein.**

| Chromosome | Interference parameter |              |            |             | Escape parameter |            | $L_{female}$ | $L_{male}$ |
|------------|------------------------|--------------|------------|-------------|------------------|------------|--------------|------------|
|            | $v_{female}$           | $sd_{femal}$ | $u_{male}$ | $sd_{male}$ | $p_{female}$     | $p_{male}$ |              |            |
| 1          | 8.4702                 | 0.0135       | 8.2771     | 0.0062      | 0.0944           | 0.0999     | 1.2912       | 1.3214     |
| 2          | 8.2381                 | 0.0136       | 7.9271     | 0.0060      | 0.0853           | 0.0761     | 1.1733       | 1.183      |
| 3          | 8.1513                 | 0.0141       | 7.2162     | 0.0046      | 0.0661           | 0.0512     | 1.093        | 1.1619     |
| 4          | 9.5248                 | 0.0248       | 8.8468     | 0.0099      | 0.1583           | 0.1341     | 1.1062       | 1.1125     |
| 5          | 8.5267                 | 0.016        | 7.7356     | 0.0061      | 0.0714           | 0.0641     | 1.0674       | 1.1529     |
| 6          | 9.0066                 | 0.0233       | 8.6921     | 0.0096      | 0.1463           | 0.1357     | 1.0343       | 1.0618     |
| 7          | 8.1867                 | 0.0165       | 7.4905     | 0.0062      | 0.0914           | 0.0722     | 1.0376       | 1.0584     |
| 8          | 8.5741                 | 0.017        | 8.1558     | 0.0075      | 0.0824           | 0.0701     | 1.0267       | 1.0296     |
| 9          | 8.7029                 | 0.0203       | 8.8957     | 0.0106      | 0.075            | 0.0662     | 0.9095       | 0.9685     |
| 10         | 8.0909                 | 0.0165       | 7.5326     | 0.0061      | 0.0643           | 0.0476     | 0.9426       | 1.0067     |
| 11         | 8.8935                 | 0.0196       | 8.2175     | 0.0079      | 0.0863           | 0.0941     | 0.9873       | 1.0509     |
| 12         | 9.8103                 | 0.0338       | 9.37       | 0.0128      | 0.0892           | 0.075      | 0.8392       | 0.8903     |
| 13         | 9.4918                 | 0.0284       | 8.251      | 0.0082      | 0.0716           | 0.0531     | 0.8465       | 0.9306     |
| 14         | 10.4953                | 0.0482       | 9.1639     | 0.0139      | 0.0992           | 0.0681     | 0.7939       | 0.8602     |
| 15         | 9.8287                 | 0.0382       | 8.4859     | 0.0102      | 0.073            | 0.0531     | 0.7581       | 0.851      |
| 16         | 9.7676                 | 0.0352       | 8.0966     | 0.0082      | 0.0751           | 0.0488     | 0.78         | 0.875      |
| 17         | 12.6922                | 0.1082       | 10.0184    | 0.0211      | 0.1304           | 0.1061     | 0.694        | 0.8203     |
| 18         | 13.94                  | 0.1292       | 8.9504     | 0.0127      | 0.138            | 0.076      | 0.7196       | 0.817      |
| 19         | 10.0178                | 0.0419       | 7.4066     | 0.0061      | 0.0654           | 0.0399     | 0.72         | 0.8809     |
| 20         | 12.2664                | 0.1042       | 9.5088     | 0.033       | 0.0989           | 0.0818     | 0.6626       | 0.6696     |
| 21         | 10.5899                | 0.0557       | 9.7147     | 0.0187      | 0.0824           | 0.0604     | 0.6981       | 0.7471     |
| 22         | 15.0447                | 0.1911       | 11.312     | 0.0277      | 0.1121           | 0.0837     | 0.6393       | 0.7487     |
| 23         | 16.7165                | 0.3469       | 11.3275    | 0.043       | 0.0919           | 0.0715     | 0.5703       | 0.6172     |
| 24         | 14.067                 | 0.1666       | 9.8328     | 0.0352      | 0.0877           | 0.0768     | 0.6222       | 0.6358     |
| 25         | 47.8346                | 11.0619      | 18.7867    | 0.2804      | 0.0866           | 0.0837     | 0.5244       | 0.5463     |
| 26         | 19.1931                | 0.5221       | 13.6051    | 0.1122      | 0.0968           | 0.1094     | 0.5705       | 0.5726     |
| 27         | 44.9032                | 10.1088      | 50.0000    | 12.3312     | 0.0994           | 0.1229     | 0.5313       | 0.521      |
| 28         | 40.3072                | 8.8968       | 43.0031    | 7.6867      | 0.1715           | 0.1503     | 0.5477       | 0.5358     |
| 29         | 26.6136                | 2.0512       | 12.5159    | 0.1032      | 0.0915           | 0.0873     | 0.5362       | 0.5673     |

**Supplemental Table 7. Estimates of interference and escape interference on each chromosome for female and male in Jersey.**

| Chromosome | Interference parameter |               |            |             | Escape parameter |            | $L_{female}$ | $L_{male}$ |
|------------|------------------------|---------------|------------|-------------|------------------|------------|--------------|------------|
|            | $v_{female}$           | $sd_{female}$ | $v_{male}$ | $sd_{male}$ | $p_{female}$     | $p_{male}$ |              |            |
| 1          | 6.6860                 | 0.0149        | 6.312      | 0.0039      | 0.0195           | 0.0198     | 1.2084       | 1.235      |
| 2          | 6.4713                 | 0.0156        | 5.9535     | 0.0042      | 0.0207           | 0.0166     | 1.1019       | 1.1291     |
| 3          | 6.1629                 | 0.0178        | 6.2892     | 0.0048      | 0.0225           | 0.0143     | 0.9842       | 1.0797     |
| 4          | 7.2353                 | 0.0219        | 6.4055     | 0.005       | 0.0365           | 0.0267     | 1.0287       | 1.045      |
| 5          | 6.6147                 | 0.0196        | 6.2136     | 0.0046      | 0.0242           | 0.0173     | 1.002        | 1.1065     |
| 6          | 7.2462                 | 0.0255        | 6.4179     | 0.0058      | 0.0426           | 0.035      | 0.961        | 1.0208     |
| 7          | 6.2652                 | 0.019         | 6.054      | 0.0043      | 0.0256           | 0.0134     | 0.9773       | 1.0021     |
| 8          | 6.7625                 | 0.0195        | 6.0383     | 0.0047      | 0.0239           | 0.0176     | 0.9537       | 0.976      |
| 9          | 6.9464                 | 0.0252        | 6.402      | 0.006       | 0.0217           | 0.0165     | 0.8685       | 0.9274     |
| 10         | 7.0975                 | 0.0271        | 6.4418     | 0.0055      | 0.0255           | 0.0148     | 0.9166       | 0.9729     |
| 11         | 7.2851                 | 0.028         | 6.7386     | 0.0067      | 0.0309           | 0.0367     | 0.9496       | 1.0094     |
| 12         | 7.2497                 | 0.0405        | 6.5858     | 0.0076      | 0.0256           | 0.0178     | 0.7568       | 0.8264     |
| 13         | 7.0006                 | 0.0328        | 6.7095     | 0.0079      | 0.021            | 0.0165     | 0.771        | 0.8633     |
| 14         | 8.0843                 | 0.0521        | 6.988      | 0.0087      | 0.0312           | 0.0177     | 0.7536       | 0.8127     |
| 15         | 8.1108                 | 0.0594        | 7.1766     | 0.0105      | 0.0325           | 0.018      | 0.6987       | 0.7772     |
| 16         | 7.9364                 | 0.0467        | 6.6308     | 0.0083      | 0.0223           | 0.0183     | 0.7419       | 0.8428     |
| 17         | 8.9149                 | 0.0973        | 7.5635     | 0.0123      | 0.0345           | 0.0225     | 0.6573       | 0.7866     |
| 18         | 9.1354                 | 0.1019        | 6.986      | 0.0116      | 0.0408           | 0.0191     | 0.6886       | 0.752      |
| 19         | 8.2021                 | 0.0712        | 6.7221     | 0.0097      | 0.0319           | 0.016      | 0.7085       | 0.8269     |
| 20         | 10.575                 | 0.2002        | 6.9921     | 0.0182      | 0.0446           | 0.0289     | 0.6106       | 0.6089     |
| 21         | 8.4442                 | 0.0857        | 6.494      | 0.0103      | 0.0298           | 0.0156     | 0.6543       | 0.6877     |
| 22         | 10.4304                | 0.1677        | 8.0019     | 0.0214      | 0.0362           | 0.0269     | 0.6053       | 0.6916     |
| 23         | 11.1212                | 0.4084        | 8.0864     | 0.0272      | 0.035            | 0.0276     | 0.5408       | 0.6006     |
| 24         | 11.4805                | 0.3351        | 7.3131     | 0.0202      | 0.0401           | 0.0247     | 0.5978       | 0.5915     |
| 25         | 21.883                 | 3.767         | 10.539     | 0.103       | 0.0407           | 0.0397     | 0.4925       | 0.5091     |
| 26         | 11.8205                | 0.3454        | 9.2452     | 0.0646      | 0.0336           | 0.0393     | 0.5331       | 0.5356     |
| 27         | 19.6387                | 2.1022        | 9.8799     | 0.0993      | 0.0386           | 0.0308     | 0.4932       | 0.4677     |
| 28         | 17.5138                | 1.7216        | 19.0518    | 0.8984      | 0.0532           | 0.0525     | 0.5221       | 0.5004     |
| 29         | 15.8311                | 0.9987        | 8.4196     | 0.0455      | 0.0332           | 0.0291     | 0.5089       | 0.5099     |

**Supplemental Table 8. SNPs associated with interference parameter in male for Holstein and Jersey.**

| SNP_rs     | SNP                    | Chr | Position | Freq | Beta  | <i>P</i> -value       |
|------------|------------------------|-----|----------|------|-------|-----------------------|
| rs43640523 | BTA-78285-no-rs        | 10  | 86717378 | 0.53 | 0.54  | $9.2 \times 10^{-12}$ |
| rs43643710 | BTB-00438757           | 10  | 86956123 | 0.36 | 0.53  | $2.2 \times 10^{-10}$ |
| rs41257023 | Hapmap57084-ss46526565 | 10  | 87016969 | 0.64 | -0.53 | $2.3 \times 10^{-10}$ |
| rs43640475 | BTB-00438922           | 10  | 86679535 | 0.36 | 0.52  | $3.8 \times 10^{-10}$ |
| rs41591947 | UA-IFASA-7857          | 10  | 86774733 | 0.44 | -0.49 | $9.0 \times 10^{-10}$ |
| rs43644595 | ARS-BFGL-NGS-113063    | 10  | 86615332 | 0.63 | 0.45  | $6.6 \times 10^{-8}$  |



**Supplemental Table 9. Estimates of interference and escape on each maternal age group for Holstein.**

| <b>Maternal Age (month)</b> | $n_{all}$ | $v_{all}$ | $sd_{all}$ | $p_{all}$ | $n_{679}$ | $v_{679}$ | $sd_{679}$ | $p_{679}$ |
|-----------------------------|-----------|-----------|------------|-----------|-----------|-----------|------------|-----------|
| 25~35                       | 12469     | 9.7728    | 0.0063     | 0.0776    | 679       | 8.4723    | 1.2845     | 0.0705    |
| 35~45                       | 13919     | 9.9626    | 0.0066     | 0.0812    | 679       | 9.5446    | 1.9686     | 0.0777    |
| 45~55                       | 11204     | 9.8546    | 0.0075     | 0.0801    | 679       | 9.5075    | 1.7337     | 0.0766    |
| 55~65                       | 6180      | 10.0042   | 0.0149     | 0.0855    | 679       | 9.6628    | 1.8261     | 0.0819    |
| 65~75                       | 3222      | 9.7805    | 0.0262     | 0.0654    | 679       | 8.1066    | 1.535      | 0.0692    |
| 75~85                       | 1678      | 9.6705    | 0.0486     | 0.0603    | 679       | 7.9939    | 0.8983     | 0.035     |
| 85~95                       | 722       | 9.158     | 0.0917     | 0.0586    | 679       | 7.4633    | 0.9401     | 0.0376    |
| 95~180                      | 696       | 10.006    | 0.1394     | 0.0655    | 679       | 7.9399    | 0.7098     | 0.0237    |

**Supplemental Table 10. Distribution of crossover counts in each maternal age groups for Holstein.**  $\text{Min}(N_i(x))$  is the statistic from chromosome 1.

| Maternal Age (month) | Number of Individuals | Crossover Counts |              |              |             |
|----------------------|-----------------------|------------------|--------------|--------------|-------------|
|                      |                       | 0                | 1            | 2            | 3           |
| 25~35                | 12469                 | 2544(20.40%)     | 5319(42.66%) | 3642(29.21%) | 964(7.73%)  |
| 35~45                | 13919                 | 2848(20.46%)     | 6103(43.85%) | 3945(28.34%) | 1023(7.35%) |
| 45~55                | 11204                 | 2466(22.01%)     | 4756(42.45%) | 3131(27.95%) | 851(7.6%)   |
| 55~65                | 6180                  | 1349(21.83%)     | 2643(42.77%) | 1720(27.83%) | 468(7.57%)  |
| 65~75                | 3222                  | 750(23.28%)      | 1342(41.65%) | 897(27.84%)  | 233(7.23%)  |
| 75~85                | 1678                  | 375(22.35%)      | 709(42.25%)  | 478(28.49%)  | 116(6.91%)  |
| 85~95                | 722                   | 154(21.33%)      | 312(43.21%)  | 211(29.22%)  | 45(6.23%)   |
| 95~180               | 696                   | 143(20.55%)      | 280(40.23%)  | 226(32.47%)  | 47(6.75%)   |
| $\text{Min}(N_i(x))$ | 679                   | 143(21.06%)      | 280(41.24%)  | 211(31.08%)  | 45(6.63%)   |
